# Supplementary material for: Anisotropic conductive films based on highly aligned polyimide fibers containing hybrid materials of graphene nanoribbons and carbon nanotubes
Source: Royal Society of Chemistry journal article supplement (doi:10.1039/c4nr06117a), 2014-11-21
Supplement: c4nr06117a1.pdf [file c4nr06117a1.pdf]

**Supplementary Information for**

**Anisotropic Conductive Films Based on Highly Aligned Polyimide Fibers  
Containing Hybrid Materials of Graphene Nanoribbons and Carbon Nanotubes**

Mingkai Liu,<sup>ab</sup> Yifeng Du,<sup>a</sup> Yue-E Miao,<sup>a</sup> Qianwei Ding,<sup>a</sup> Sixin He,<sup>a</sup> Weng Wee Tjiu,<sup>c</sup> Jisheng Pan<sup>c</sup> and Tianxi Liu<sup>\*ab</sup>

<sup>a</sup> State Key Laboratory of Molecular Engineering of Polymers, Department of Macromolecular Science, Fudan University, Shanghai 200433, P. R. China. Fax: +86-21-65640293; Tel: +86-21-55664197; E-mail: [txliu@fudan.edu.cn](mailto:txliu@fudan.edu.cn)

<sup>b</sup> School of Chemistry and Chemical Engineering and Jiangsu Key Laboratory of Green Synthetic Chemistry for Functional Materials, Jiangsu Normal University, Xuzhou 221116, P. R. China

<sup>c</sup> Institute of Materials Research and Engineering, A\*STAR (Agency for Science, Technology and Research), 3 Research Link, Singapore, 117602, Singapore.

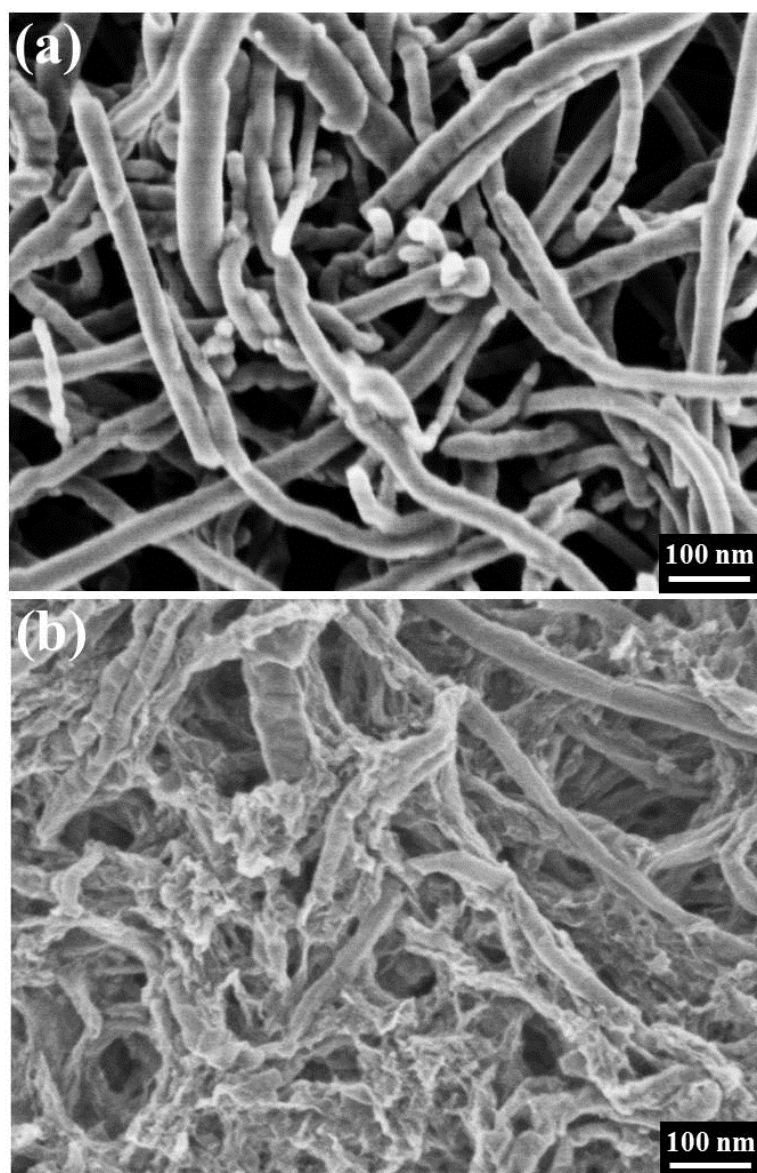

**Figure S1.** SEM images of (a) pristine CNTs and (b) GNR/CNT hybrid.

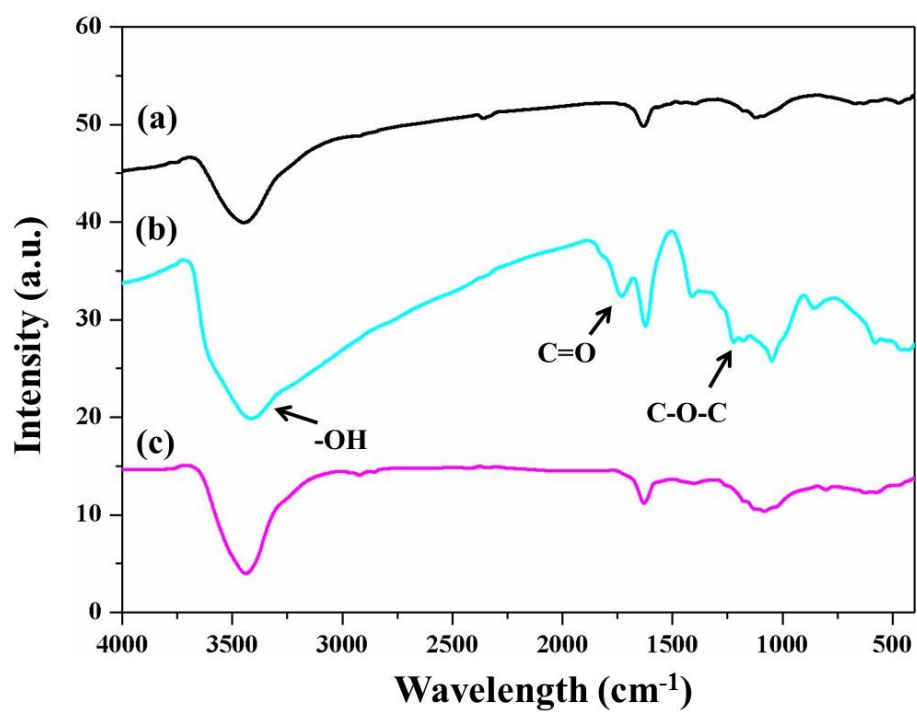

**Figure S2.** FTIR spectra of (a) pristine CNTs, (b) oxidized GNR/CNT and (c) GNR/CNT hybrid.

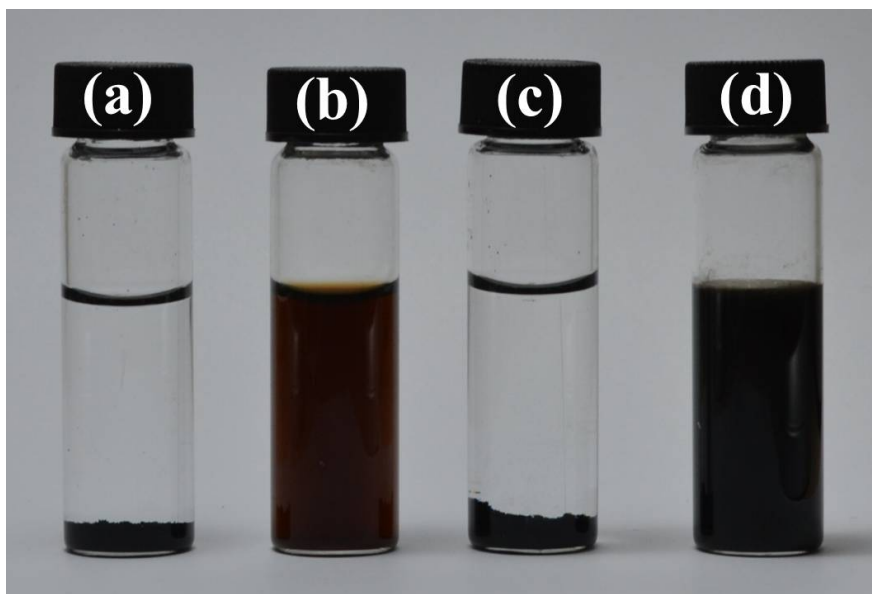

**Figure S3.** Digital picture showing the dispersion stability of (a) pristine CNTs, (b) oxidized GNR/CNT hybrid, (c) GNR/CNT hybrid in water, as well as GNR/CNT hybrid in DMAc.

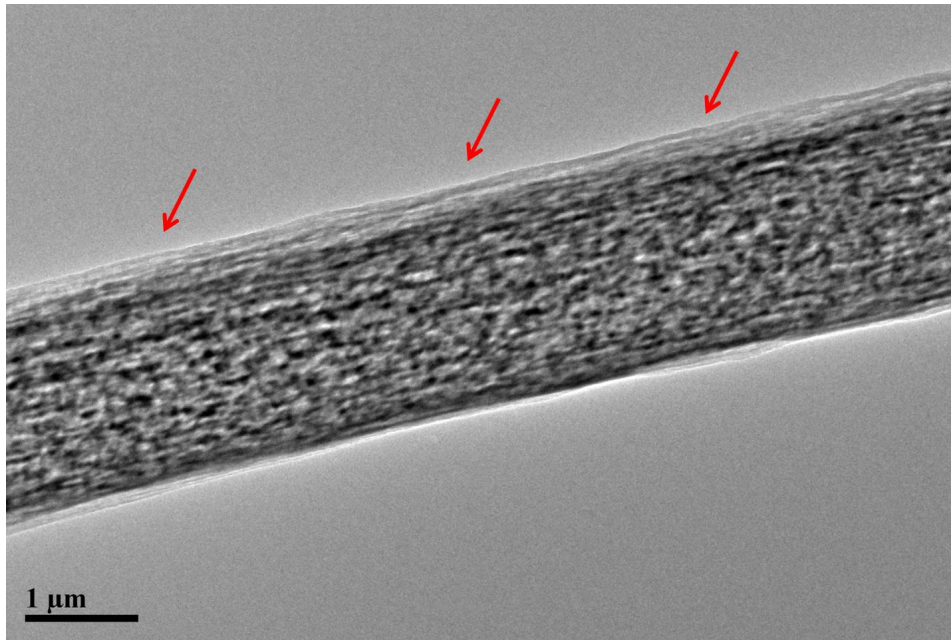

**Figure S4.** TEM image of single PI-GNR/CNT composite fiber (9 wt% GNR/CNT hybrid) at high magnification.

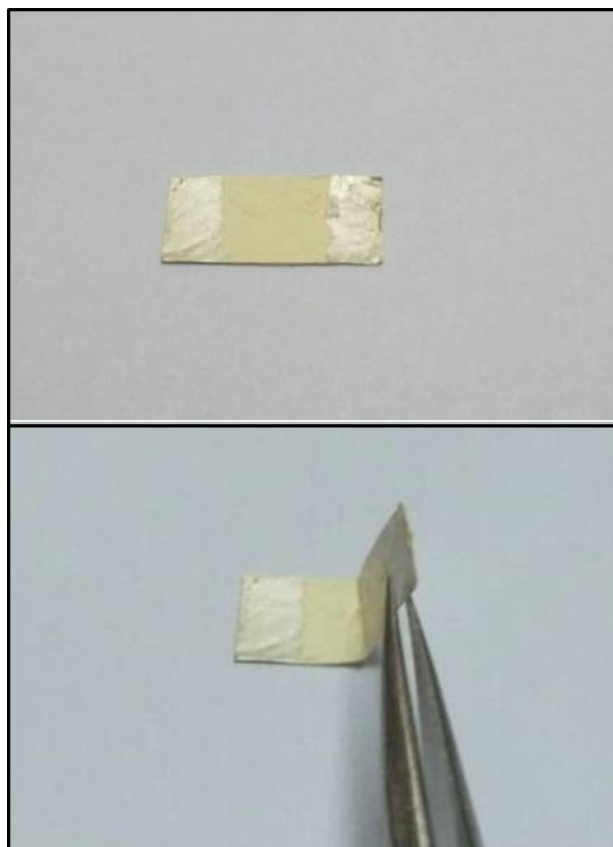

**Figure S5.** Digital photograph of flexible PI-GNR/CNT (9 wt %) composite film upon bending.
